# Supplementary material for: Disrupted structural connectivity of fronto-deep gray matter pathways in progressive supranuclear palsy
Source: PubMed Central journal article supplement — Neuroimage Clin. 2019 Jun 15;23:101899. doi: 10.1016/j.nicl.2019.101899 (PMC6593210; doi:10.1016/j.nicl.2019.101899), 2019-06-15
Supplement: mmc1.pdf [file mmc1.pdf]

## **Supplementary Material**

### **Disrupted structural connectivity of fronto-deep gray matter pathways in progressive supranuclear palsy**

Alexandra Abos<sup>1</sup>, Barbara Segura<sup>1,2</sup>, Hugo C Baggio<sup>1</sup>, Anna Campabadal<sup>1</sup>, Carme Uribe<sup>1</sup>, Alicia Garrido<sup>3</sup>, Ana Camara<sup>3</sup>, Esteban Muñoz<sup>2,3,4</sup>, Francesc Valldeoriola<sup>2,3,4</sup>, Maria Jose Marti<sup>2,3,4</sup>, Carme Junque<sup>1,2,4</sup>, Yaroslau Compta<sup>2,3,4</sup>

<sup>1</sup>Medical Psychology Unit, Department of Medicine. Institute of Neuroscience, University of Barcelona. Barcelona, Catalonia, Spain.

<sup>2</sup>Centro de Investigación Biomédica en Red sobre Enfermedades Neurodegenerativas (CIBERNED), Hospital Clínic de Barcelona. Barcelona, Catalonia, Spain.

<sup>3</sup>Movement Disorders Unit, Neurology Service, Hospital Clínic de Barcelona. Institute of Neuroscience, University of Barcelona, Barcelona, Catalonia, Spain.

<sup>4</sup>Institute of Biomedical Research August Pi i Sunyer (IDIBAPS). Barcelona, Catalonia, Spain.

**\*Corresponding author:** Dr. Yaroslau Compta

Supplementary Table 1A. Cortical regions of interest derived from the Desikan-Killiany atlas.

## Frontal

- Superior Frontal
- Rostral and Caudal Middle Frontal
- Pars Opercularis, Pars Triangularis, and Pars Orbitalis
- Lateral and Medial Orbitofrontal
- Precentral
- Paracentral
- Frontal Pole

## Parietal

- Superior Parietal
- Inferior Parietal
- Supramarginal
- Postcentral
- Precuneus

## Temporal

- Superior, Middle, and Inferior Temporal
- Banks of the Superior Temporal Sulcus
- Fusiform
- Transverse Temporal
- Entorhinal
- Temporal Pole
- Parahippocampal

## Occipital

- Lateral Occipital
- Lingual
- Cuneus
- Pericalcarine

## Cingulate

- Rostral Anterior
- Caudal Anterior
- Posterior
- Isthmus

## Insula

Supplementary Table 1B. Deep grey matter structures derived from the automated FreeSurfer segmentation atlas.

- Nucleus accumbens
- Amygdala
- Caudate nucleus
- Hippocampus
- Pallidum
- Putamen
- Thalamus
- Ventral diencephalon, including the hypothalamus, mammillary body, subthalamic nuclei, substantia nigra, red nucleus, lateral geniculate nucleus, and medial geniculate nucleus.
- Cerebellar white matter, including the middle cerebellar peduncle.

Supplementary Table 2. Forty-one significant reduced connections in PSP patients compared with HC found by TFNBS.

| <b>Cortico-DGM connections</b>               |                                                      |
|----------------------------------------------|------------------------------------------------------|
| Right medialorbitofrontal -Left Accumbens    | Left precentral -Right Caudate                       |
| Right medialorbitofrontal -Left Caudate      | Left parsopercularis -Right Hippocampus              |
| Right parsorbitalis -Left Hippocampus        | Left cuneus -Right Putamen                           |
| Right precuneus -Left Hippocampus            | Left lingual -Right Putamen                          |
| Right superior temporal -Left Hippocampus    | Left superiorparietal -Right Putamen                 |
| Left parsopercularis -Left Pallidum          | Right parsopercularis -Right Putamen                 |
| Left parsopercularis -Left Putamen           | Right parstriangularis -Right Putamen                |
| Left parsorbitalis -Left Putamen             | Left precentral -Right Thalamus                      |
| Left parstriangularis -Left Putamen          | Left superiorparietal -Right Thalamus                |
| Left parsorbitalis -Left Thalamus            | Right entorhinal -Right Thalamus                     |
| Left parstriangularis -Left Thalamus         | Left postcentral -Right VentralDC                    |
| Left parsorbitalis -Left VentralDC           | Left precentral -Right VentralDC                     |
| Left parstriangularis -Left VentralDC        | Left superiorparietal -Right VentralDC               |
| Left parstriangularis -Left Cerebellum       | Left rostralmiddlefrontal -Right Cerebellum          |
| <b>Cortico cortical connections</b>          | <b>Deep grey matter Deep grey matter connections</b> |
| Left parahippocampal -Left parsorbitalis     | Left Hippocampus -Left Thalamus                      |
| Left lingual -Right parsorbitalis            | Right Hippocampus -Right Thalamus                    |
| Left superiorfrontal -Right parstriangularis | Right Hippocampus -Right Cerebellum                  |
| Left precentral -Right precentral            |                                                      |
| Left postcentral -Right precuneus            |                                                      |
| Left superiorfrontal -Right superiorfrontal  |                                                      |
| Right precentral -Right superiorfrontal      |                                                      |
| Left paracentral -Right superiorparietal     |                                                      |
| Left postcentral -Right superiorparietal     |                                                      |
| Right lingual -Right superior temporal       |                                                      |

Supplementary Table 3. Summary of the forty-one significant reduced connections in PSP patients compared with HC found by TFNBS.

| <b>Cortico-cortical tracts</b>           |              |                    |              |            |            |
|------------------------------------------|--------------|--------------------|--------------|------------|------------|
| <b>F-F</b>                               | <b>F-P</b>   | <b>F-T</b>         | <b>F-O</b>   | <b>O-T</b> | <b>P-P</b> |
| 4                                        | 2            | 1                  | 1            | 1          | 1          |
| <b>Cortico-Deep grey matter tracts</b>   |              |                    |              |            |            |
| <b>F-DGM</b>                             | <b>P-DGM</b> | <b>T-DGM</b>       | <b>O-DGM</b> |            |            |
| 20                                       | 5            | 1                  | 2            |            |            |
| <b>Deep grey matter-Deep grey matter</b> |              |                    |              |            |            |
| <b>DGM-DGM</b>                           |              |                    |              |            |            |
| 3                                        |              |                    |              |            |            |
| <b>LH-LH</b>                             | <b>RH-RH</b> | <b>LH-RH/RH-LH</b> |              |            |            |
| 11                                       | 4            | 26                 |              |            |            |

HC: healthy controls; PSP: Progressive supranuclear palsy patient group; F: Frontal; P: Parietal; T: Temporal; O: Occipital; DGM: deep grey matter structures; LH: Left hemisphere; RH: Right hemisphere.

Supplementary Table 4 A. Global graph measures in the occipital-DGM network by group

|                               | <b>HC (n=20)</b> | <b>PSP (n=19)</b> | <b>Stat/ p</b>     |
|-------------------------------|------------------|-------------------|--------------------|
| <b>Modularity</b>             | 0.5695 (0.015)   | 0.5579 (0.0334)   | T=1.40561/p=.2873  |
| <b>Clustering coefficient</b> | 1.0049 (0.005)   | 1.0098 (0.0147)   | T=1.43800/p=.2873  |
| <b>Nodal degree</b>           | 24.657 (0.182)   | 24.5182 (0.395)   | T=1.42626/p=.2873  |
| <b>Small Worldness</b>        | 1.0046 (0.005)   | 1.0065 (0.0113)   | T=0.6939/p=.5034   |
| <b>Path Length</b>            | 1.0003 (0.006)   | 1.0033 (0.009)    | T=1.190621/p=.3170 |

HC: healthy controls; PSP: Progressive supranuclear palsy patient group; \* refers to FDR corrected results; Stats refers to T-test (T).

Supplementary Table 4 B. Global graph measures in the parietal-DGM network by group

|                               | <b>HC (n=20)</b> | <b>PSP (n=19)</b> | <b>Stat/ p</b>    |
|-------------------------------|------------------|-------------------|-------------------|
| <b>Modularity</b>             | 0.5693 (0.022)   | 0.5601 (0.031)    | T=1.08123/p=.3292 |
| <b>Clustering coefficient</b> | 1.0503 (0.021)   | 1.0712 (0.036)    | T=2.248458/p=.143 |
| <b>Nodal degree</b>           | 27.417 (0.509)   | 27.077 (0.669)    | T=1.78915/p=.147  |
| <b>Small Worldness</b>        | 0.9823 (0.014)   | 0.9905 (0.032)    | T=1.0659/p=.3292  |
| <b>Path Length</b>            | 1.0694 (0.020)   | 1.0816 (0.023)    | T=1.759393/p=.147 |

HC: healthy controls; PSP: Progressive supranuclear palsy patient group; \* refers to FDR corrected results; Stats refers to T-test (T).

Supplementary Table 4 C. Global graph measures in the temporal-DGM network by group

|                               | <b>HC (n=20)</b> | <b>PSP (n=19)</b> | <b>Stat/ p</b>     |
|-------------------------------|------------------|-------------------|--------------------|
| <b>Modularity</b>             | 0.5726 (0.014)   | 0.5708 (0.018)    | T=0.34151/p=.724   |
| <b>Clustering coefficient</b> | 1.2382 (0.070)   | 1.2613 (0.109)    | T=0.790443/p=.724  |
| <b>Nodal degree</b>           | 30.405 (1.007)   | 30.175 (1.048)    | T=0.69957/p=.724   |
| <b>Small Worldness</b>        | 1.1423 (0.060)   | 1.1536 (0.088)    | T=0.471128/p=.8353 |
| <b>Path Length</b>            | 1.0841 (0.027)   | 1.0928 (0.028)    | T=0.980812/p=.724  |

HC: healthy controls; PSP: Progressive supranuclear palsy patient group; \* refers to FDR corrected results; Stats refers to T-test (T).

Supplementary Table 5. Volumetric measures (mm<sup>3</sup>) of subcortical ROIs by group.

|                          | <b>HC (n=20)</b> | <b>PSP (n=19)</b> | <b>Stat/ p</b>    |
|--------------------------|------------------|-------------------|-------------------|
| <b>Left Accumbens</b>    | 469.35(101.9)    | 367.316(98.5)     | T=3.177/p=.010*   |
| <b>Left Amygdala</b>     | 1447.85(208.8)   | 1334.105(235.1)   | T=1.6/p=.146      |
| <b>Left Caudate</b>      | 3242.9(432.3)    | 3008.158(651.6)   | T=1.332/p=.206    |
| <b>Left Hippocampus</b>  | 3737.7(348.2)    | 3155.158(555.2)   | T=3.95/p=.0019*   |
| <b>Left Pallidum</b>     | 1536.75(220.1)   | 1245.105(238.6)   | T=3.97/p=.005*    |
| <b>Left Putamen</b>      | 4807.15(570.6)   | 4249.737(642)     | T=2.869/p=.01*    |
| <b>Left Thalamus</b>     | 6085.45(601.2)   | 5603.684(967.5)   | T=2.51/p=.083*    |
| <b>Left Ventral DC</b>   | 3782.35(434.7)   | 3107.474(390.8)   | T=5.09/p=.0019*   |
| <b>Left Cerebellum</b>   | 15551.7(4981.8)  | 12274.053(2816.9) | T=2.51 /p=.01*    |
| <b>Right Accumbens</b>   | 539.45(97.2)     | 444.474(82.1)     | T=3.287/p=.0063*  |
| <b>Right Amygdala</b>    | 1498.55(183.3)   | 1390.789(254.3)   | T=1.524/p=.152    |
| <b>Right Caudate</b>     | 3302.2(505.5)    | 3038.684(786.9)   | T=1.251/p=.226    |
| <b>Right Hippocampus</b> | 3767.25(431.2)   | 3238.842(522.1)   | T=3.454/p=.005*   |
| <b>Right Pallidum</b>    | 1384.7(197.5)    | 1189.737(239.9)   | T=2.777/p=.0114*  |
| <b>Right Putamen</b>     | 4517.9(574.9)    | 3973.053(669.2)   | T=2.732/p=.0162*  |
| <b>Right Thalamus</b>    | 6155.75(653.6)   | 5615.263(871.5)   | T=2.198/p=0.0418* |
| <b>Right Ventral DC</b>  | 3581.05(399.1)   | 3127.105(357.8)   | T=3.733/p=.0038*  |
| <b>Right Cerebellum</b>  | 14149(2199.4)    | 12176.789(2990.5) | T=2.354/p=.0357*  |

HC: healthy controls; PSP: Progressive supranuclear palsy patient group; \* refers to FDR corrected results; Stats refers to T-test (T).



Supplementary Figure 1. Diffusion measures maps in PSP patients compared with HC.

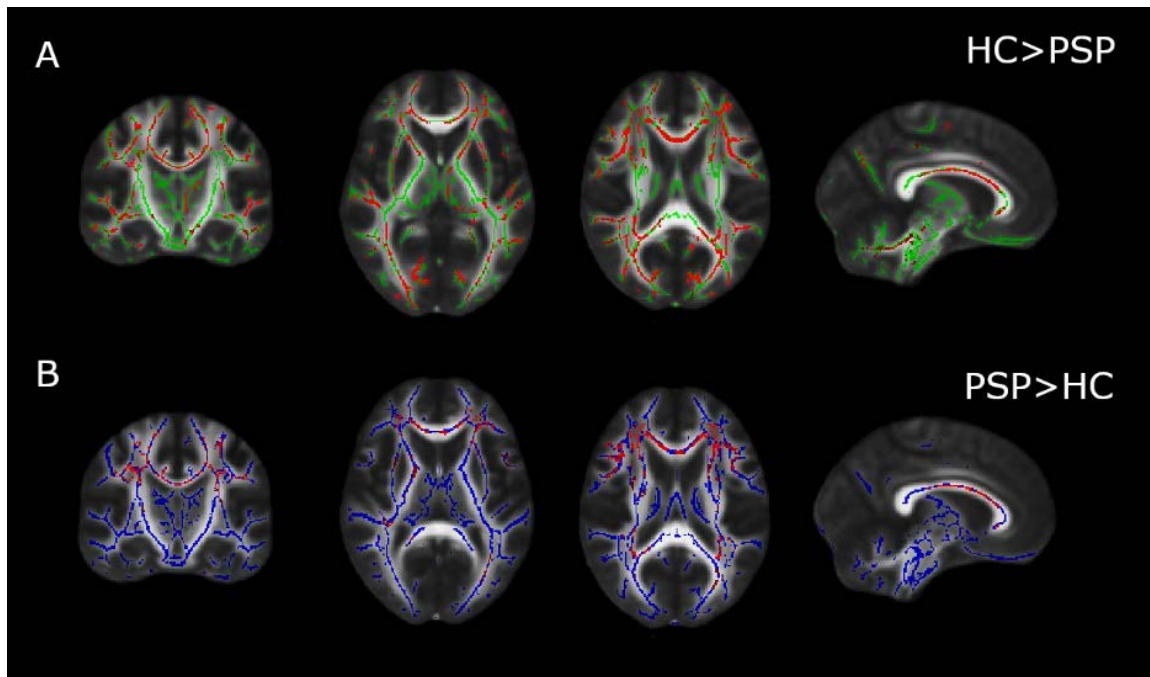

*A. White matter maps showing regions of significant decreased fractional anisotropy (FA) in PSP patients compared with HC. B. White matter maps showing regions of significant increased mean diffusivity (MD) in PSP patients compared with HC. Background image corresponds to the mean fractional anisotropy image of all subjects in standard MNI152 space. Fractional anisotropy white matter skeleton is represented by green voxels. Mean diffusivity white matter skeleton is represented by blue voxels. Significant tracts are shown in red ( $p < 0.025$ , bonferroni corrected). HC: healthy controls; PSP: progressive supranuclear palsy patient group.*

## **PSP-RS subtype analyses**

Of the 19 PSP patients in our samples, 15 were classified as having PSP with Richardson's syndrome (PSP-RS). No significant intergroup differences were observed between HC and PSP-RS patients for age, gender and years of education ( $p=0.780$ ,  $p=0.148$  and  $p=0.080$ , respectively).

### *Significant intergroup structural connectivity effects*

Supplementary Figure 2 and Supplementary Table 6 show the 56 connections with significantly different NOS between groups (all  $p < 0.05$ , FDR corrected). Many connectivity reductions observed in PSP-RS compared with HC were also found when considering all PSP patients as a single group.

From the 56 connections, 17 (30.4%) were found to be cortico-cortical tracts, 33 (58.9%) were cortico-DGM tracts and 6 (10.7%) DGM-DGM tracts (Supplementary Table 7 and Supplementary figure 3). Concretely, fronto-DGM connections were predominantly reduced in PSP-RS compared with healthy controls. No connections showed significantly higher NOS in PSP-RS patients compared with HC.

Cortico-DGM NOS significantly correlated with PSPRS score ( $r=-0.509$ ,  $p=0.026$ ; see Supplementary figure 4).

### *Classification procedure*

The LR classification algorithm correctly predicted overall group membership with an accuracy of 85%, with 100% sensitivity and 75% specificity. The 56 structural connections that showed

significant group effects when using the whole sample were obtained in more than 85% of the iterations.

#### *Graph-metrics analyses*

As shown in the main results, no group effect was found between PSP-RS and HC in global graph parameters when considering the whole-brain network (Supplementary table 8A). In the fronto-DGM subnetwork, PSP patients showed a reduced global degree (GD) (Supplementary table 8B).

Supplementary Table 6. Fifty-six significant reduced connections in PSP-RS patients compared with HC found by TFNBS.

| <b>Cortico-cortical connections</b>                  |                                            |
|------------------------------------------------------|--------------------------------------------|
| Left inferiorparietal-Left inferiortemporal          | Left precentral-Right precuneus            |
| Left inferiorparietal-Left middletemporal            | Left lingual-Right rostralmiddlefrontal    |
| Left parahippocampal-Left parsorbitalis              | Left superiorfrontal-Right superiorfrontal |
| Left inferiorparietal-Left superiorparietal          | Right precentral-Right superiorfrontal     |
| Left superiorfrontal-Right parsopercularis           | Left postcentral-Right superiorparietal    |
| Left superiorfrontal-Right parstriangularis          | Right lingual-Right superiortemporal       |
| Left precentral-Right precentral                     | Right inferiortemporal-Right temporalpole  |
| Left superiorparietal-Right precentral               | Right lingual-Right temporalpole           |
| Left postcentral-Right precuneus                     |                                            |
| <b>Cortico-DGM connections</b>                       |                                            |
| Right medialorbitofrontal-Left Accumbens             | Left superiorfrontal-Right Hippocampus     |
| Right medialorbitofrontal-Left Caudate               | Left lingual-Right Putamen                 |
| Right precuneus-Left Hippocampus                     | Left paracentral-Right Putamen             |
| Right superiortemporal-Left Hippocampus              | Left precuneus-Right Putamen               |
| Left parsopercularis-Left Pallidum                   | Left superiorparietal-Right Putamen        |
| Left parsopercularis-Left Putamen                    | Right parsopercularis-Right Putamen        |
| Left parstriangularis-Left Putamen                   | Right parstriangularis-Right Putamen       |
| Left parsorbitalis-Left Thalamus                     | Left precentral-Right Thalamus             |
| Left parstriangularis-Left Thalamus                  | Left superiorparietal-Right Thalamus       |
| Left parstriangularis-Left VentralDC                 | Right entorhinal-Right Thalamus            |
| Left parstriangularis-Left Cerebellum                | Right temporalpole-Right Thalamus          |
| Left cuneus-Right Caudate                            | Left postcentral-Right VentralDC           |
| Left lingual-Right Caudate                           | Left precentral-Right VentralDC            |
| Left precentral-Right Caudate                        | Left superiorparietal-Right VentralDC      |
| Right parsopercularis-Right Caudate                  | Right temporalpole-Right VentralDC         |
| Left parsopercularis-Right Hippocampus               | Left rostralmiddlefrontal-Right Cerebellum |
| Left postcentral-Right Hippocampus                   |                                            |
| <b>Deep grey matter-Deep grey matter connections</b> |                                            |
| Left Hippocampus-Left-Thalamus                       | Right Hippocampus-Right Thalamus           |
| Left Hippocampus-Left VentralDC                      | Left Cerebellum-Right VentralDC            |
| Right Hippocampus-Right Putamen                      | Right Hippocampus-Right Cerebellum         |

Supplementary Table 7. Summary of the fifty-six significant reduced connections in PSP-RS patients compared with HC found by TFNBS.

| <b>Cortico-cortical tracts</b>           |              |                    |              |            |            |            |            |
|------------------------------------------|--------------|--------------------|--------------|------------|------------|------------|------------|
| <b>F-F</b>                               | <b>F-P</b>   | <b>F-T</b>         | <b>F-O</b>   | <b>O-T</b> | <b>P-P</b> | <b>P-T</b> | <b>T-T</b> |
| 5                                        | 3            | 1                  | 1            | 2          | 2          | 2          | 1          |
| <b>Cortico-Deep grey matter tracts</b>   |              |                    |              |            |            |            |            |
| <b>F-DGM</b>                             | <b>P-DGM</b> | <b>T-DGM</b>       | <b>O-DGM</b> |            |            |            |            |
| 19                                       | 7            | 4                  | 3            |            |            |            |            |
| <b>Deep grey matter-Deep grey matter</b> |              |                    |              |            |            |            |            |
| <b>DGM-DGM</b>                           |              |                    |              |            |            |            |            |
| 6                                        |              |                    |              |            |            |            |            |
| <b>LH-LH</b>                             | <b>RH-RH</b> | <b>LH-RH/RH-LH</b> |              |            |            |            |            |
| 13                                       | 14           | 29                 |              |            |            |            |            |

HC: healthy controls; PSP-RS: Richardsonian progressive supranuclear palsy patient group; F: Frontal; P: Parietal; T: Temporal; O: Occipital; DGM: deep grey matter structures; LH: Left hemisphere; RH: Right hemisphere.

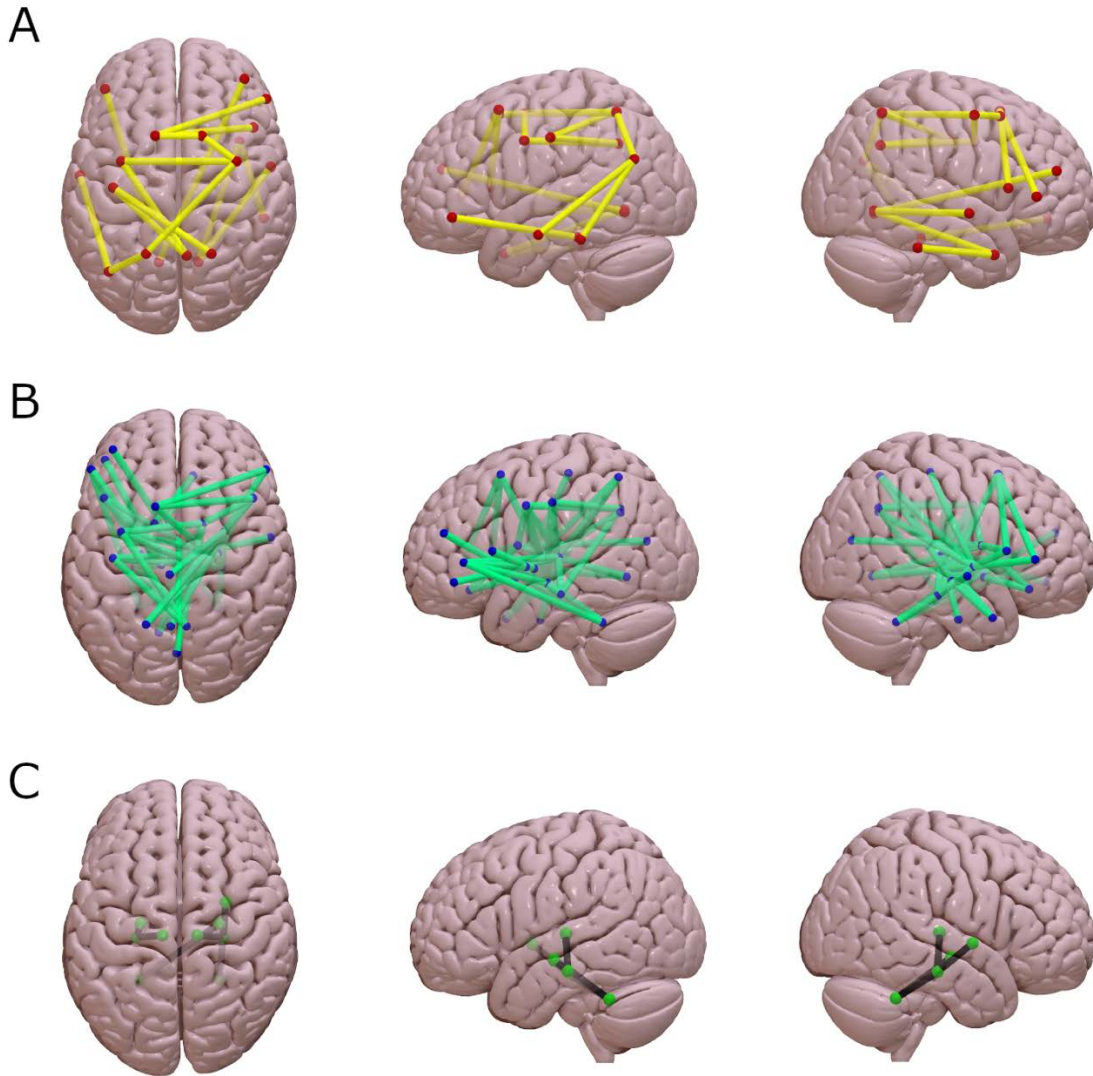

Supplementary Figure 2. *Schematic representation of the 56 structural connections with reduced structural connectivity strength in progressive supranuclear palsy patients with Richardson's syndrome (PSP-RS) compared with healthy controls using threshold-free network based statistics.*

A. Connectivity differences between groups in cortico-cortical tracts ( $p < 0.05$ , FDR corrected).

B. Connectivity differences between groups in cortico-deep gray matter tracts ( $p < 0.05$ , FDR corrected).

C. Connectivity differences between groups in deep gray matter-deep gray matter tracts ( $p < 0.05$ , FDR corrected).

Connectivity figures were drawn using Surf Ice ([www.nitrc.org](http://www.nitrc.org)).

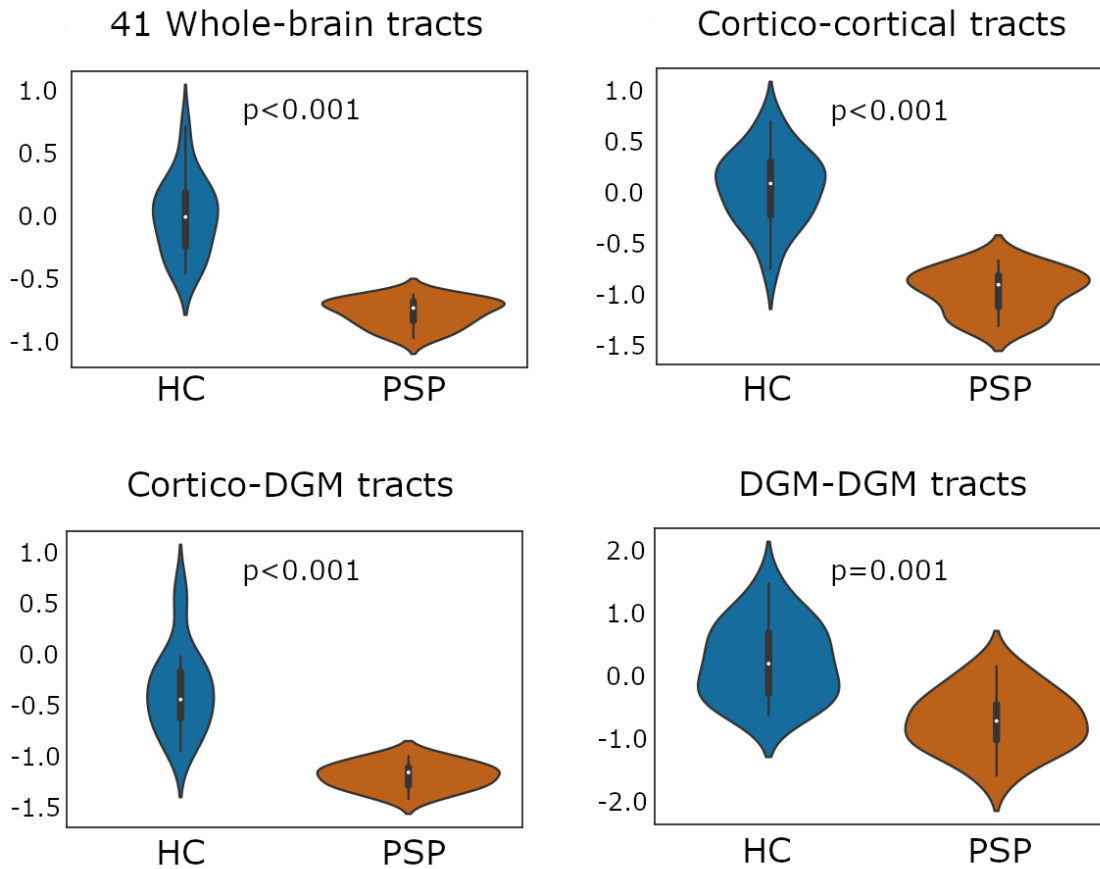

Supplementary Figure 3. *Comparison of global graph metrics between progressive supranuclear palsy patients with Richardson's syndrome and healthy controls in the fronto-deep gray matter subnetwork.*

Plots illustrate the distribution of the nodal degree, clustering coefficient, path length, small worldness and modularity in the fronto-deep gray matter subnetwork between groups. Significance of intergroup analyses ( $p < 0.05$ , FDR corrected) are shown. HC: healthy controls; PSP-RS: progressive supranuclear palsy with Richardson's syndrome group.

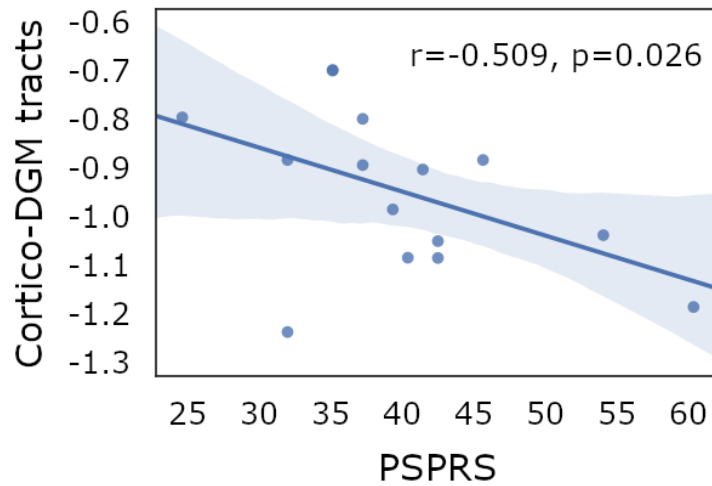

Supplementary Figure 4. *Relationship between structural connectivity and PSPRS in progressive supranuclear palsy patients with richardsonian subtype.*

Significant correlation between the mean NOS Z-score from the cortico-DGM reduced connections in PSP-RS patients and the PSPRS scale.



Supplementary Table 8A. Whole-brain global graph measures by group

|                               | <b>HC (n=20)</b> | <b>PSP (n=15)</b> | <b>Stat/ p</b>   |
|-------------------------------|------------------|-------------------|------------------|
| <b>Modularity</b>             | 0.5197 (0.013)   | 0.5198 (0.165)    | T=0.0295/p=.8412 |
| <b>Clustering coefficient</b> | 1.4638 (0.103)   | 1.5190 (0.127)    | T=1.4190/p=.2636 |
| <b>Nodal degree</b>           | 68.295 (2.367)   | 66.612 (2.982)    | T=1.8662/p=.2620 |
| <b>Small Worldness</b>        | 1.301 (0.083)    | 1.3414 (0.103)    | T=1.2804/p=.2630 |
| <b>Path Length</b>            | 1.1247 (0.016)   | 1.1319 (0.017)    | T=1.2676/p=.2630 |

HC: healthy controls; PSP: Progressive supranuclear palsy patient group; Stats refers to Student's t-test (T).

Supplementary Table 8B. Global graph measures in the fronto-DGM network by group

|                               | <b>HC (n=20)</b> | <b>PSP (n=15)</b> | <b>Stat/ p</b>    |
|-------------------------------|------------------|-------------------|-------------------|
| <b>Modularity</b>             | 0.4826 (0.021)   | 0.4780 (0.026)    | T=0.5832/p=.6154  |
| <b>Clustering coefficient</b> | 1.608 (0.045)    | 1.206 (0.075)     | T=2.1885/p=.0610  |
| <b>Nodal degree</b>           | 33.862 (0.793)   | 32.703 (1.230)    | T=3.3877/p=.0190* |
| <b>Small Worldness</b>        | 1.087 (0.037)    | 1.1246 (0.057)    | T=2.3636/p=.0590  |
| <b>Path Length</b>            | 1.068 (0.017)    | 1.0717 (0.026)    | T=0.5134/p=.6154  |

HC: healthy controls; PSP: Progressive supranuclear palsy patient group; DGM: Deep gray matter structures; \* refers to FDR corrected results; Stats refers to Student's t-test (T).
